# Supplementary material for: IGF-1R down regulates the sensitivity of hepatocellular carcinoma to sorafenib through the PI3K / akt and RAS / raf / ERK signaling pathways
Source: PubMed Central journal article supplement (PMC9875405; doi:10.1186/s12885-023-10561-7), 2023-01-25

**Figure 1A.**  
**IGF-1R**

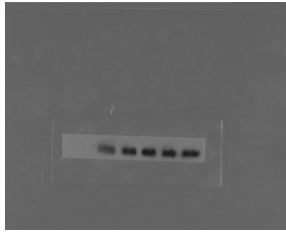

**$\beta$ -actin**

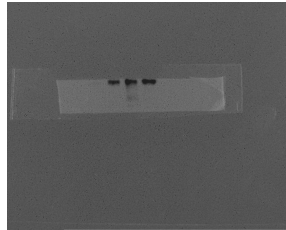

**Figure 2A.**  
**SK-Hep1**  
 **$\beta$ -actin**

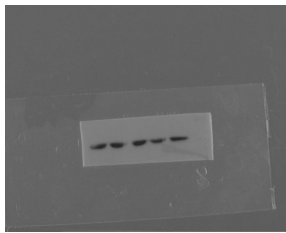

**IGF-1R**

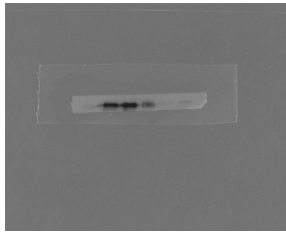

**$\beta$ -actin**

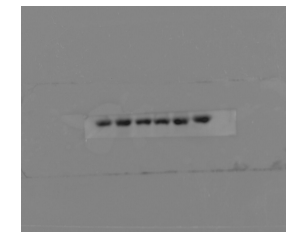

**HepG2**

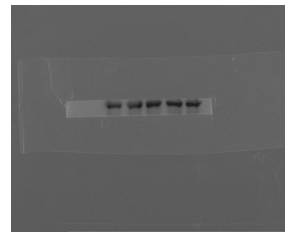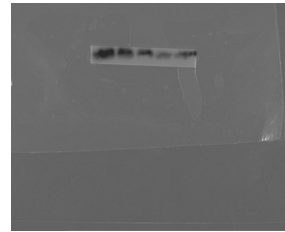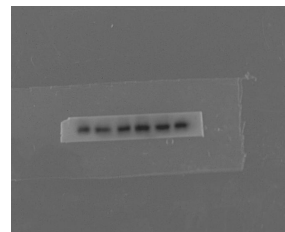

**IGF-1R**

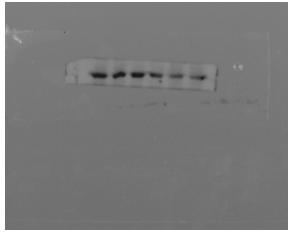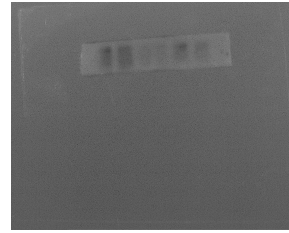

**p-IGF-1R**

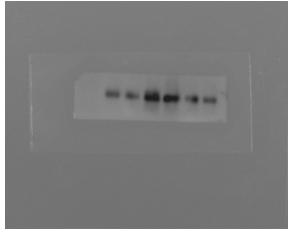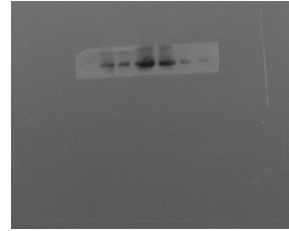

**Figure 5A**

**SK-Hep1**

**$\beta$ -actin**

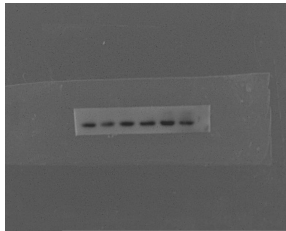

**HepG2**

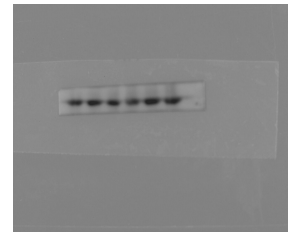

**Akt**

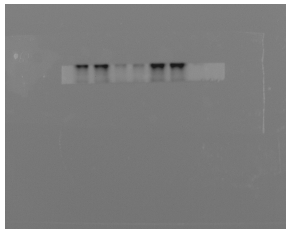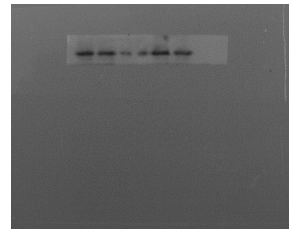

**ERK**

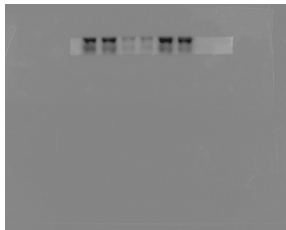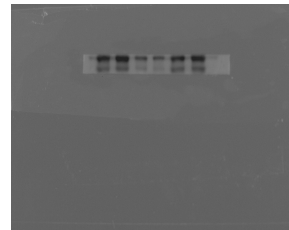

**MEK**

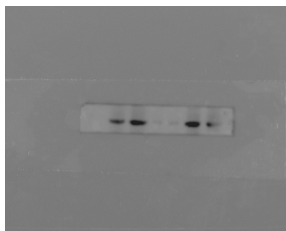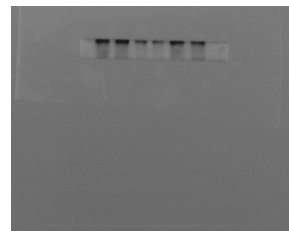

**mTOR**

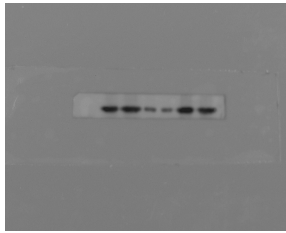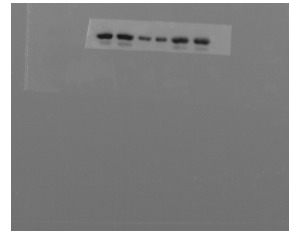

**p-Akt**

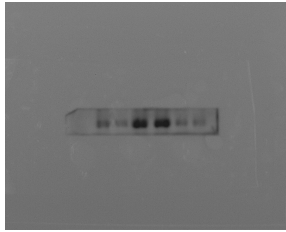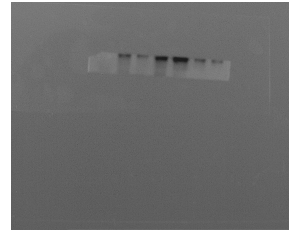

**p-ERK**

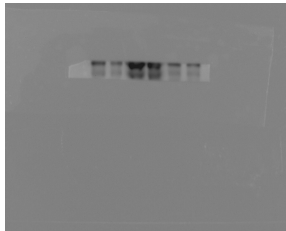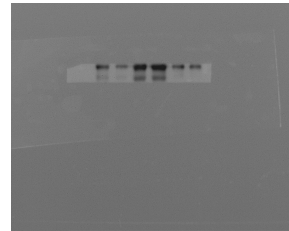

**p-MEK**

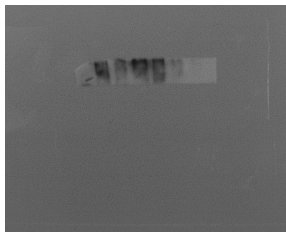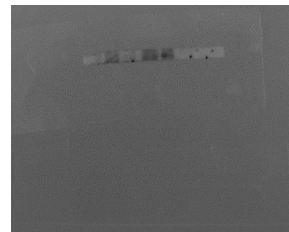

**p-mTOR**

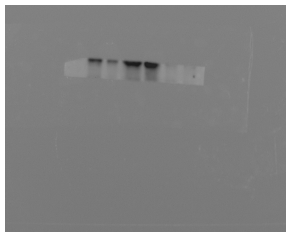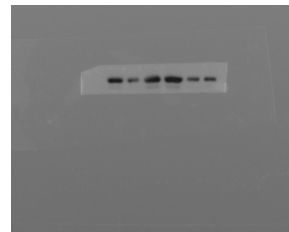

**Figure 5C**

**$\beta$ -actin**

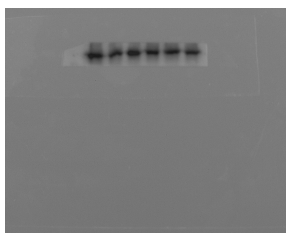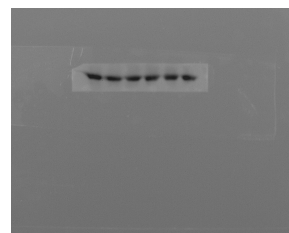

**Caspase3**

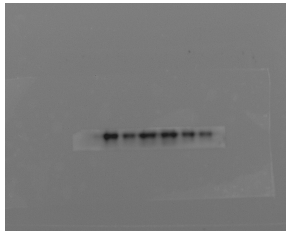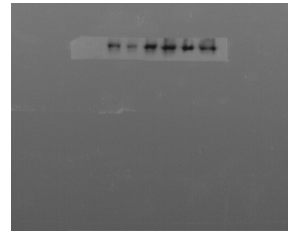

**C-Caspase3**

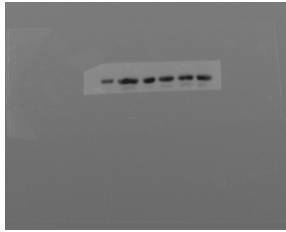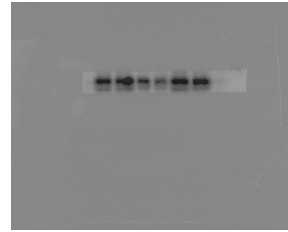

**c-PARP**

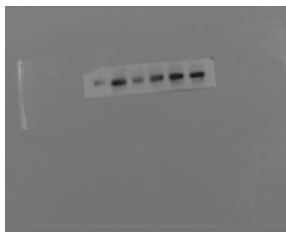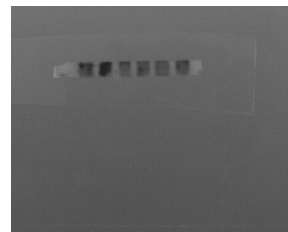

**PARP**

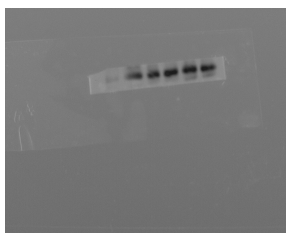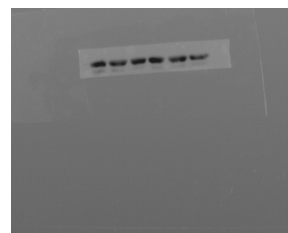

Supplement: 12885_2023_10561_MOESM1_ESM.pdf [file 12885_2023_10561_MOESM1_ESM.pdf]
